# Supplementary material for: HGF, sIL-6R and TGF-β1 Play a Significant Role in the Progression of Multiple Myeloma
Source: PubMed Central journal article supplement — J Cancer. 2014 Jun 11;5(7):518–24. doi: 10.7150/jca.9266 (PMC4067511; doi:10.7150/jca.9266), 2014-06-11
Supplement: jcav05p0518s1.pdf [file jcav05p0518s1.pdf]

Supplementary table 1. Correlation between cytokines, their soluble receptors and age in MM patients.

|                        | r      | n  | <i>p</i> -value |
|------------------------|--------|----|-----------------|
| IL-6 (pg/ml)           | -0.033 | 65 | 0.795           |
| sIL-6R (ng/ml)         | -0.047 | 65 | 0.708           |
| VEGF (pg/ml)           | 0.080  | 65 | 0.526           |
| sVEGF-R2 (pg/ml)       | -0.208 | 65 | 0.096           |
| HGF (pg/ml)            | 0.053  | 76 | 0.652           |
| b-FGF (pg/ml)          | -0.093 | 76 | 0.424           |
| TGF- $\beta_1$ (ng/ml) | -0.057 | 76 | 0.628           |

b-FGF, b-fibroblast growth factor; HGF, hepatocyte growth factor; IL-6, interleukin-6; MM, multiple myeloma; sIL-6R, soluble IL-6 receptor; sVEGF-R2, soluble VEGF receptor; TGF- $\beta_1$ , transforming growth factor- $\beta_1$ ; VEGF, vascular endothelial growth factor;

Supplementary table 2. Adjusting studied parameters for age.

|                                | Patients with MM |        | Healthy controls |        |
|--------------------------------|------------------|--------|------------------|--------|
|                                | age              |        | age              |        |
|                                | r                | p      | r                | p      |
| Albumin (g/l)                  | 0,07             | p=0,55 |                  |        |
| Alpha 1 globulin (%)           | -0,04            | p=0,75 |                  |        |
| Alpha 2 globulin (%)           | -0,03            | p=0,83 |                  |        |
| Beta globulin (%)              | -0,04            | p=0,72 |                  |        |
| Gamma globulin (%)             | -0,03            | p=0,80 |                  |        |
| Total Protein (g/l)            | -0,17            | p=0,18 |                  |        |
| WBC (K/ $\mu$ l)               | -0,18            | p=0,14 | 0,18             | p=0,37 |
| RBC (M/ $\mu$ l)               | 0,09             | p=0,46 | -0,22            | p=0,28 |
| Hb (g/dl)                      | 0,09             | p=0,50 | -0,20            | p=0,31 |
| Hct (%)                        | 0,11             | p=0,40 | -0,20            | p=0,32 |
| PLT (K/ $\mu$ l)               | -0,10            | p=0,41 | -0,21            | p=0,29 |
| Urea (mmol/l)                  | 0,30             | p=0,06 | 0,36             | p=0,42 |
| Creatinine ( $\mu$ mol/l)      | 0,11             | p=0,51 | 0,44             | p=0,33 |
| CRP (mg/l)                     | -0,04            | p=0,88 |                  |        |
| $\beta_2$ microglobulin (mg/l) | 0,23             | p=0,36 |                  |        |
| Calcium (mmol/l)               | 0,11             | p=0,47 | -0,25            | p=0,59 |
| LDH (U/l)                      | -0,04            | p=0,82 | 0,59             | p=0,16 |
| IL-6 (pg/ml)                   | -0,03            | p=0,80 | 0,26             | p=0,14 |
| sIL-6R (ng/ml)                 | -0,05            | p=0,71 | -0,10            | p=0,59 |
| VEGF (pg/ml)                   | 0,08             | p=0,53 | 0,42             | p=0,01 |
| sVEGF-R2 (pg/ml)               | -0,21            | p=0,10 | 0,20             | p=0,25 |
| HGF (pg/ml)                    | 0,05             | p=0,65 | 0,37             | p=0,03 |
| b-FGF (pg/ml)                  | -0,09            | p=0,42 | -0,16            | p=0,37 |
| TGF- $\beta_1$ (ng/ml)         | -0,06            | p=0,63 | 0,20             | p=0,25 |

b-FGF, b-fibroblast growth factor; Hb, hemoglobin; Hct, hematocrit; HGF, hepatocyte growth factor; IL-6, interleukin-6; LDH, lactate dehydrogenase; MM, multiple myeloma; NS, not significant; PLT, blood platelets; RBC, red blood cells; sIL-6R, soluble IL-6 receptor; sVEGF-R2, soluble VEGF receptor; TGF- $\beta_1$ , transforming growth factor- $\beta_1$ ; VEGF, vascular endothelial growth factor; WBC, white blood cells

Supplementary table 3. Analysis of correlation between the percentage of plasma cells in the bone marrow and the studied cytokines and soluble cytokine receptors in MM patients.

| Cytokine               | n  | Pearson r | p      |
|------------------------|----|-----------|--------|
| IL-6 (pg/ml)           | 31 | -0,014    | 0,94   |
| sIL-6R (ng/ml)         | 31 | 0,272     | 0,14   |
| VEGF (pg/ml)           | 31 | -0,591    | 0,001* |
| sVEGF-R2 (pg/ml)       | 31 | -0,227    | 0,22   |
| HGF (pg/ml)            | 37 | 0,125     | 0,46   |
| b-FGF (pg/ml)          | 37 | 0,085     | 0,62   |
| TGF- $\beta_1$ (ng/ml) | 37 | -0,347    | 0,04*  |

\*-p<0.05

b-FGF, b-fibroblast growth factor; HGF, hepatocyte growth factor; IL-6, interleukin-6; MM, multiple myeloma; NS, not significant; SD, standard deviation; sIL-6R, soluble IL-6 receptor; sVEGF-R2, soluble VEGF receptor; TGF- $\beta_1$ ; transforming growth factor- $\beta_1$ ; VEGF, vascular endothelial growth factor
